# Supplementary material for: Potential of Adsorption of Diverse Environmental Contaminants onto Microplastics
Source: MDPI journal article supplement (doi:10.3390/w14244086), 2022-12-14
Supplement: s1 [file s1]

# Potential of Adsorption of Diverse Environmental Contaminants onto Microplastics

Chaehwi Lim, Namgyu Kim, Junho Lee, and Yeojoon Yoon\*

Department of Environmental and Energy Engineering, Yonsei University,  
Wonju 26493, Republic of Korea

\* Correspondence: yajoony@yonsei.ac.kr; Tel.: +82-33-760-2461

**Table S1.** Particle size distribution analyzer data of MPs used in this study.

| Classification | Median size (μm) | Mean size (μm) |
|----------------|------------------|----------------|
| PS-1           | 16.91234         | 14.88109       |
| PS-2           | 35.58807         | 36.92708       |
| PS-3           | 136.81146        | 141.10008      |
| PET-1          | 15.80849         | 16.91234       |
| PET-2          | 76.95945         | 79.50906       |
| PET-3          | 165.35893        | 168.82979      |
| HDPE-1         | 18.02758         | 19.59808       |
| HDPE-2         | 62.76528         | 74.64938       |
| HDPE-3         | 187.95775        | 202.75264      |
| LDPE-1         | 14.71942         | 15.94158       |
| LDPE-2         | 68.22383         | 70.72485       |
| LDPE-3         | 157.61681        | 163.89438      |
